# Supplementary material
Source: PubMed Central journal article supplement (PMC6916125)
Supplement: Supp_Data.pdf [file Supp_Data.pdf]

## Supplementary Data

SUPPLEMENTARY TABLE S1. PREOPERATIVE OSTEOPOROSIS AND CARDIOVASCULAR RISK CATEGORIES

|                          | <i>High risk</i>                                                                                                                                                                                                   | <i>Intermediate risk</i>                                                                                                                                                                                                         | <i>Low risk</i>                                                   |
|--------------------------|--------------------------------------------------------------------------------------------------------------------------------------------------------------------------------------------------------------------|----------------------------------------------------------------------------------------------------------------------------------------------------------------------------------------------------------------------------------|-------------------------------------------------------------------|
| Atrial fibrillation risk | Clinical heart disease<br>Age >75 years<br>Comorbidities: <ul style="list-style-type: none"> <li>• Valvular heart disease</li> <li>• TIA or stroke</li> <li>• Vascular disease</li> <li>• Renal failure</li> </ul> | Age >60 years<br>HTN<br>Symptomatic thyrotoxicosis<br>Cardiovascular risk factors: <ul style="list-style-type: none"> <li>• Diabetes</li> <li>• HTN</li> <li>• Hyperlipidemia</li> <li>• Cigarette smoking</li> </ul>            | Age <60 years<br>No comorbidities                                 |
| Osteoporosis risk        | Postmenopausal (age >50 years or oophorectomy)<br>Prior radiotherapy                                                                                                                                               | Perimenopausal women (age 40–50 years)<br>Osteopenia<br>Osteoporosis risk factors: <ul style="list-style-type: none"> <li>• Cigarette smoking</li> <li>• Gastric bypass</li> <li>• Anorexia</li> <li>• Family history</li> </ul> | Age <40 years<br>No comorbidities<br>No osteoporosis risk factors |
